# Supplementary material for: Novel Outcome Biomarkers Identified With Targeted Proteomic Analyses of Plasma From Critically Ill Coronavirus Disease 2019 Patients
Source: PubMed Central journal article supplement — Crit Care Explor. 2020 Aug 24;2(9):e0189. doi: 10.1097/CCE.0000000000000189 (PMC7449255; doi:10.1097/cce.0000000000000189), 2020-08-24
Supplement: cc9-2-e0189-s001.pdf [file cc9-2-e0189-s001.pdf]

**Supplemental Table 1.** Plasma proteins predict COVID19+ ICU patients vs. healthy controls.

| <b>Num</b> | <b>Assay</b> | <b>Unipro ID</b> | <b>Function</b>                                                                                                                                                                                                                                                                                                                             |
|------------|--------------|------------------|---------------------------------------------------------------------------------------------------------------------------------------------------------------------------------------------------------------------------------------------------------------------------------------------------------------------------------------------|
| 1.         | TYMP         | P19971           | Thymidine phosphorylase also called platelet-derived endothelial cell growth factor is an intracellular protein whose major source is platelets (1). It may be involved in platelet activation and its secreted metabolites may potentiate thrombosis (1).                                                                                  |
| 2.         | CXCL10       | P02778           | Induced by IFN $\gamma$ , produced by endothelial cells, monocytes, fibroblasts and keratinocytes (2). Agonist for CXCR3 which is expressed on some T, B, and NK cells (2). Promotes Th1 recruitment (3) induces T cell adherence to endothelial cells, chemoattractant for monocytes, T cells, NKs (2).                                    |
| 3.         | C1QA         | P02745           | Complement C1q subunit A is one of 3 subunits making up C1q, part of the classical complement system.                                                                                                                                                                                                                                       |
| 4.         | AGR2         | O95994           | Anterior gradient protein 2 homolog is a member of the protein disulfide isomerase family normally located in the endoplasmic reticulum of intestinal cells (4), as well as the lung, stomach, colon and prostate; tissues with mucus secreting or endocrine functions (5).                                                                 |
| 5.         | IL-18R1      | Q13478           | One of the heterodimers of the IL-18 receptor complex, it is a type I transmembrane protein (2). Expressed on NKs, T cells especially activated Th1 cells; it induces IFN $\gamma$ in concert with IL-12 receptor (2).                                                                                                                      |
| 6.         | CDON         | Q4KMG0           | Cell adhesion molecule-related, down-regulated by oncogenes is a transmembrane glycoprotein that acts as a cell adhesion molecule and binds members of the hedgehog family (6). It seems to normally be involved in development and proliferating cells (6).                                                                                |
| 7.         | DDX58        | O95786           | Retinoic acid-inducible gene 1, also called DEAD box protein 58, is a transmembrane pattern recognition receptor that recognizes viral replicative intermediates in the cytosol during RNA virus infections (7). It is expressed in endothelial cells (8) and activates the type 1 interferon response (7).                                 |
| 8.         | CLEC6A       | Q6EIG7           | C-type lectin domain family 6 member A, also called dectin-2 is a transmembrane pattern-recognition receptor highly expressed on macrophages as well as monocytes, Kupffer, Langerhans and some dendritic cells (9). It binds surface polysaccharides of pathogens and ultimately causes cytokine production to direct a Th17 response (9). |
| 9.         | CLM-6        | Q08708           | CMRF35-like molecule 6 also called leukocyte mono-immunoglobulin-like receptor 8 (LMIR8) and CD300c                                                                                                                                                                                                                                         |

|     |         |        |                                                                                                                                                                                                                                                                                   |
|-----|---------|--------|-----------------------------------------------------------------------------------------------------------------------------------------------------------------------------------------------------------------------------------------------------------------------------------|
|     |         |        | is a transmembrane receptor expressed on almost all leukocytes and plasmacytoid dendritic cells (10) it recognizes phosphatidylethanolamine on apoptotic cells (11).                                                                                                              |
| 10. | PXN     | P49023 | Paxillin is a cytosolic scaffolding protein involved in focal adhesions and integrin-mediated signal transduction (12).                                                                                                                                                           |
| 11. | LAG3    | P18627 | Lymphocyte activation gene 3 is a transmembrane receptor expressed on several types of T cells that regulates their function (13).                                                                                                                                                |
| 12. | APLP1   | P51693 | Amyloid-like protein 1 is expressed exclusively in the central nervous system and is a cytosolic protein thought to be involved in cell-cell contacts in synapses (14).                                                                                                           |
| 13. | LIF-R   | P42702 | Leukemia inhibitory factor receptor is a transmembrane protein that along with gp130 forms receptor for LIF, a member of the IL-6 family (15). LIF-R is expressed in several organs as well as monocytes and macrophages (15).                                                    |
| 14. | B4GALT1 | P15291 | Beta-1,4-galactosyltransferase 1 is a trans-golgi membrane protein that transfers a sugar nucleotide to acceptors (16). When on the plasma membrane, it functions as a cell-adhesion molecule involved in cell-cell and cell-matrix interaction (16).                             |
| 15. | ASGR1   | P07306 | 1 of two subunits of the asialoglycoprotein receptor, which is mainly expressed in liver, that facilitates uptake of desialylated glycoproteins (17). It is a member of the C-type lectin family of receptors and can clear hyposialylated vonWillebrand factor from plasma (18). |
| 16. | CRIM1   | Q9NZV1 | Cysteine-rich motor neuron 1 is a transmembrane receptor that regulates growth factor signaling in a number of organs during organogenesis (19).                                                                                                                                  |
| 17. | CD300E  | Q496F6 | Also called CLM-2, it is a transmembrane receptor expressed on the surface of monocytes and circulating myeloid dendritic cells (10). It appears to be involved in inducing cytokine release, reactive oxygen species production (10).                                            |
| 18. | CDKN1A  | P38936 | Cyclin-dependent kinase inhibitor 1 also called p21 and CIP1 is a nuclear and cytoplasmic protein which can arrest the cell cycle due to DNA damage and is anti-apoptotic (20).                                                                                                   |
| 19. | CXCL11  | O14625 | A ligand for CXCR3 which is expressed on some T, B, and NK cells (2). It promotes Th1 recruitment/chemotaxis (2, 3).                                                                                                                                                              |
| 20. | IL6     | P05231 | A key pro-inflammatory cytokine it can directly stimulate cells through its membrane-bound receptor on hepatocytes, neutrophils, monocytes, and some                                                                                                                              |

|  |  |  |                                                                                                                                  |
|--|--|--|----------------------------------------------------------------------------------------------------------------------------------|
|  |  |  | lymphocytes (21). In concert with its soluble receptor, it can also stimulate a wide-variety of cells that expresses gp130 (21). |
|--|--|--|----------------------------------------------------------------------------------------------------------------------------------|

CLM - CMRF35-like molecule

CXCR – CXC receptor

IFN $\gamma$  – interferon gamma

IL – interleukin

NK – natural killer cell

Th1 – type 1 T-helper cell

## References

1. Li W, Yue H: Thymidine phosphorylase: a potential new target for treating cardiovascular disease. *Trends Cardiovasc Med* 2018; 28:157–171
2. Thomson AW, Lotze MT: The cytokine handbook. Amsterdam; Boston: Academic Press; 2003.
3. Foti M, Locati M: Cytokine Effector Functions in Tissues [Internet]. San Diego, UNITED STATES: Elsevier Science & Technology; 2017. [cited 2020 Jun 9] Available from: <http://ebookcentral.proquest.com/lib/west/detail.action?docID=4917635>
4. Park S-W, Zhen G, Verhaeghe C, et al.: The protein disulfide isomerase AGR2 is essential for production of intestinal mucus. *PNAS* 2009; 106:6950–6955
5. Brychtova V, Vojtesek B, Hrstka R: Anterior gradient 2: A novel player in tumor cell biology. *Cancer Letters* 2011; 304:1–7
6. Sanchez-Arrones L, Cardozo M, Nieto-Lopez F, et al.: Cdon and Boc: Two transmembrane proteins implicated in cell–cell communication. *The International Journal of Biochemistry & Cell Biology* 2012; 44:698–702
7. Streicher F, Jouvenet N: Stimulation of Innate Immunity by Host and Viral RNAs. *Trends in Immunology* 2019; 40:1134–1148
8. Opitz B, Eitel J, Meixenberger K, et al.: Role of Toll-like receptors, NOD-like receptors and RIG-I-like receptors in endothelial cells and systemic infections. *Thromb Haemost* 2009; 102:1103–1109

9. Feinberg H, Jégouzo SAF, Rex MJ, et al.: Mechanism of pathogen recognition by human dectin-2. *J Biol Chem* 2017; 292:13402–13414
10. Borrego F: The CD300 molecules: an emerging family of regulators of the immune system. *Blood* 2013; 121:1951–1960
11. Takahashi M, Izawa K, Kashiwakura J, et al.: Human CD300C Delivers an Fc Receptor- $\gamma$ -dependent Activating Signal in Mast Cells and Monocytes and Differs from CD300A in Ligand Recognition. *J Biol Chem* 2013; 288:7662–7675
12. The structure and functions of paxillin and its roles in neovascularization. 6
13. Ruffo E, Wu R, Bruno TC, et al.: Lymphocyte-Activation Gene 3 (LAG3): the Next Immune Checkpoint Receptor. *Semin Immunol* 2019; 42:101305
14. Ludewig S, Korte M: Novel Insights into the Physiological Function of the APP (Gene) Family and Its Proteolytic Fragments in Synaptic Plasticity [Internet]. *Front Mol Neurosci* 2017; 9[cited 2020 Jun 12] Available from: <https://www.ncbi.nlm.nih.gov/pmc/articles/PMC5247455/>
15. Nicola NA, Babon JJ: Leukemia Inhibitory Factor (LIF). *Cytokine Growth Factor Rev* 2015; 26:533–544
16. Qasba PK, Ramakrishnan B, Boeggeman E: Structure and Function of  $\beta$ -1,4-Galactosyltransferase. *Curr Drug Targets* 2008; 9:292–309
17. van den Boogert MAW, Rader DJ, Holleboom AG: New insights into the role of glycosylation in lipoprotein metabolism. *Current Opinion in Lipidology* 2017; 28:502–506
18. O’Sullivan JM, Ward S, Lavin M, et al.: von Willebrand factor clearance – biological mechanisms and clinical significance. *British Journal of Haematology* 2018; 183:185–195
19. Iyer S, Pennisi DJ, Piper M: Crim1-, a regulator of developmental organogenesis. *Histol Histopathol* 2016; 31:1049–1057
20. Čmielová J, Řezáčová M: Protein and its function based on a subcellular localization. *Journal of Cellular Biochemistry* 2011; 112:3502–3506
21. Rose-John S, Scheller J, Elson G, et al.: Interleukin-6 biology is coordinated by membrane-bound and soluble receptors: role in inflammation and cancer. *Journal of Leukocyte Biology* 2006; 80:227–236
