# Supplementary material for: Novel Outcome Biomarkers Identified With Targeted Proteomic Analyses of Plasma From Critically Ill Coronavirus Disease 2019 Patients
Source: PubMed Central journal article supplement — Crit Care Explor. 2020 Aug 24;2(9):e0189. doi: 10.1097/CCE.0000000000000189 (PMC7449255; doi:10.1097/cce.0000000000000189), 2020-08-24
Supplement: cc9-2-e0189-s002.pdf [file cc9-2-e0189-s002.pdf]

**Supplemental Table 2.** Plasma proteins predict COVID19 status on ICU day 1.

| <b>Num</b> | <b>Assay</b> | <b>Unipro ID</b> | <b>Function</b>                                                                                                                                                                                                                                                                                             |
|------------|--------------|------------------|-------------------------------------------------------------------------------------------------------------------------------------------------------------------------------------------------------------------------------------------------------------------------------------------------------------|
| 1.         | DDX58        | O95786           | Retinoic acid-inducible gene 1, also called DEAD box protein 58, is a transmembrane pattern recognition receptor that recognizes viral replicative intermediates in the cytosol during RNA virus infections (1). It is expressed in endothelial cells (2) and activates the type 1 interferon response (1). |
| 2.         | RRM2B        | Q7LG56           | Ribonucleoside-diphosphate reductase subunit M2 B also called p53R2, is a nuclear protein thought to be involved in DNA repair after damage (3).                                                                                                                                                            |
| 3.         | IRF9         | Q00978           | Interferon regulatory factor 9 is a nuclear transcription factor that is part of a transcription complex that responds to type 1 interferon signaling (4).                                                                                                                                                  |
| 4.         | NPM1         | P06748           | Nucleophosmin is a nucleolar protein found in proliferating cells, it has functions in mitotic spindle assembly, ribosome synthesis, DNA repair, embryogenesis and chromatin remodeling (5). It can bind HEXIM1 (6) (see entry 10 below) .                                                                  |
| 5.         | MCP-3        | P80098           | Monocyte chemotactic protein 3, also called C-C motif chemokine 7 (CCL7), is the ligand for CCR1, CCR2, CCR3 and CCR5 (7, 8). It attracts monocytes, T cells, NKs immature DCs, basophils and eosinophils (7, 8).                                                                                           |
| 6.         | Gal-9        | O00182           | Galectin-9 is a pattern recognition receptor that binds $\beta$ -galactosides (9). It is expressed on various immune cells, especially T cells, and expression is increased in response to various stimuli such as mitogen, TLR activation, pro-inflammatory cytokines and viral infection (9).             |
| 7.         | NADK         | O95544           | Nicotinamide adenine dinucleotide (NAD) kinase is a ubiquitously expressed cytosolic protein that phosphorylates NAD (10).                                                                                                                                                                                  |
| 8.         | BRK1         | Q8WUW1           | Brick1 also called Hspc300, is a cytoskeleton-associated component of the Wave protein complex (11).                                                                                                                                                                                                        |
| 9.         | PFDN2        | Q9UHV9           | Prefoldin subunit 2 is a cytosolic protein, part of the hexameric prefoldin complex that captures unfolded proteins and transfers them to a chaperonin (12).                                                                                                                                                |
| 10.        | HEXIM1       | O94992           | Hexamethylene bis-acetamide-inducible protein 1 is a nuclear transcriptional regulator (6). It can bind to nucleophosmin (see entry 4 above) and hypoxia-inducible factor $\alpha$ ; may be recruited by NF- $\kappa$ B for transcription of inflammation-responsive genes (6).                             |

|     |               |        |                                                                                                                                                                                                                                                                                                                                             |
|-----|---------------|--------|---------------------------------------------------------------------------------------------------------------------------------------------------------------------------------------------------------------------------------------------------------------------------------------------------------------------------------------------|
| 11. | TCN2          | P20062 | Transcobalamin II is a serum protein that binds vitamin B12 for transport (13). It is synthesized in the intestinal mucosa, liver, seminal vesicles, fibroblasts, bone marrow, and macrophages (13).                                                                                                                                        |
| 12. | BLM hydrolase | Q13867 | Bleomycin hydrolase is a cytosolic cysteine aminopeptidase which breaks down homocysteine (14).                                                                                                                                                                                                                                             |
| 13. | KRT19         | P08727 | Keratin 19 also called cytokeratin 19 is a cytoskeletal protein expressed in laminated epithelium (15).                                                                                                                                                                                                                                     |
| 14. | FUS           | P35637 | Fused in sarcoma is a ubiquitously expressed nuclear RNA and DNA binding protein, though it also is found in the cytoplasm (16).                                                                                                                                                                                                            |
| 15. | RCOR1         | Q9UKL0 | REST corepressor 1 is a nuclear protein that is part of protein complexes that modify chromatin to repress gene expression (17).                                                                                                                                                                                                            |
| 16. | PSME1         | Q06323 | Proteasome activator complex subunit 1, also called PA28 $\alpha$ , is a subunit of PA (proteasome activator) 28 that binds to and activates the 20S proteasome (18). It is a cytosolic protein expressed in most tissues and induced by IFN $\gamma$ (18).                                                                                 |
| 17. | CXCL11        | O14625 | A ligand for CXCR3 which is expressed on some T, B, and NK cells (7). It promotes Th1 recruitment/chemotaxis (7, 19).                                                                                                                                                                                                                       |
| 18. | CLSPN         | Q9HAW4 | Claspin is a nuclear protein that associates with DNA replication stalled due to DNA damage (20). It's expression is tightly regulated during the cell cycle with high levels in late S phase and G2 (20).                                                                                                                                  |
| 19. | S100A11       | P31949 | A cytosolic calcium-binding protein of the S100 family, it is involved in growth arrest in contact inhibition (21). It is expressed in a wide variety of cells and is secreted by an unconventional pathway (21). It is involved in cell-cell contacts and can promote cell migration in response to hypoxia-induced mitogenic factor (22). |
| 20. | CDON          | Q4KMG0 | Cell adhesion molecule-related, down-regulated by oncogenes is a transmembrane glycoprotein that acts as a cell adhesion molecule and binds members of the hedgehog family (23). It seems to normally be involved in development and proliferating cells (23).                                                                              |

**Supplemental Table 2.** ICU Day 1 analytes that predict COVID19 status.

CXCR – C-X-C motif receptor

DC – dendritic cell

DEAD – Asp-Glu-Ala-Asp

IFN $\gamma$  – interferon gamma

NF- $\kappa$ B – nuclear factor kappa B

NK – natural killer cell

REST – repressor for element-1 silencing transcription

Th# – type # T-helper cell

TLR – toll-like receptor

## References

1. Streicher F, Jouvenet N: Stimulation of Innate Immunity by Host and Viral RNAs. *Trends in Immunology* 2019; 40:1134–1148
2. Opitz B, Eitel J, Meixenberger K, et al.: Role of Toll-like receptors, NOD-like receptors and RIG-I-like receptors in endothelial cells and systemic infections. *Thromb Haemost* 2009; 102:1103–1109
3. Nordlund P, Reichard P: Ribonucleotide Reductases. *Annu Rev Biochem* 2006; 75:681–706
4. Jefferies CA: Regulating IRFs in IFN Driven Disease [Internet]. *Front Immunol* 2019; 10[cited 2020 Jun 16] Available from: <https://www.ncbi.nlm.nih.gov/pmc/articles/PMC6449421/>
5. Box JK, Paquet N, Adams MN, et al.: Nucleophosmin: from structure and function to disease development [Internet]. *BMC Mol Biol* 2016; 17[cited 2020 Jun 16] Available from: <https://www.ncbi.nlm.nih.gov/pmc/articles/PMC4995807/>
6. Michels AA, Bensaude O: Hexim1, an RNA-controlled protein hub. *Transcription* 2018; 9:262–271
7. Thomson AW, Lotze MT: The cytokine handbook. Amsterdam; Boston: Academic Press; 2003.
8. Cheng JW, Sadeghi Z, Levine AD, et al.: The role of CXCL12 and CCL7 chemokines in immune regulation, embryonic development, and tissue regeneration. *Cytokine* 2014; 69:277–283
9. Lai J-H, Luo S-F, Wang M-Y, et al.: Translational Implication of Galectin-9 in the Pathogenesis and Treatment of Viral Infection [Internet]. *Int J Mol Sci* 2017; 18[cited 2020 Jun 16] Available from: <https://www.ncbi.nlm.nih.gov/pmc/articles/PMC5666790/>
10. Shi F, Li Y, Li Y, et al.: Molecular properties, functions, and potential applications of NAD kinases. *Acta Biochim Biophys Sin (Shanghai)* 2009; 41:352–361

11. Derivery E, Fink J, Martin D, et al.: Free Brick1 Is a Trimeric Precursor in the Assembly of a Functional Wave Complex [Internet]. *PLoS One* 2008; 3[cited 2020 Jun 16] Available from: <https://www.ncbi.nlm.nih.gov/pmc/articles/PMC2413427/>
12. Sahlan M, Zako T, Yohda M: Prefoldin, a jellyfish-like molecular chaperone: functional cooperation with a group II chaperonin and beyond. *Biophys Rev* 2018; 10:339–345
13. Combs Jr Gerald F, Combs Jr GF: The Vitamins [Internet]. San Diego, UNITED STATES: Elsevier Science & Technology; 2012. [cited 2020 Jun 16] Available from: <http://ebookcentral.proquest.com/lib/west/detail.action?docID=872576>
14. Zimny J, Sikora M, Guranowski A, et al.: Protective Mechanisms against Homocysteine Toxicity THE ROLE OF BLEOMYCIN HYDROLASE. *J Biol Chem* 2006; 281:22485–22492
15. Mehrpouya M, Pourhashem Z, Yardehnavi N, et al.: Evaluation of cytokeratin 19 as a prognostic tumoral and metastatic marker with focus on improved detection methods. *Journal of Cellular Physiology* 2019; 234:21425–21435
16. Ederle H, Dormann D: TDP-43 and FUS en route from the nucleus to the cytoplasm. *FEBS Letters* 2017; 591:1489–1507
17. Meier K, Brehm A: Chromatin regulation: How complex does it get? *Epigenetics* 2014; 9:1485–1495
18. Sijts EJAM, Kloetzel P-M: The role of the proteasome in the generation of MHC class I ligands and immune responses. *Cell Mol Life Sci* 2011; 68:1491–1502
19. Foti M, Locati M: Cytokine Effector Functions in Tissues [Internet]. San Diego, UNITED STATES: Elsevier Science & Technology; 2017. [cited 2020 Jun 9] Available from: <http://ebookcentral.proquest.com/lib/west/detail.action?docID=4917635>
20. Smits VAJ, Cabrera E, Freire R, et al.: Claspin – checkpoint adaptor and DNA replication factor. *The FEBS Journal* 2019; 286:441–455
21. Sakaguchi M, Huh N: S100A11, a dual growth regulator of epidermal keratinocytes. *Amino Acids* 2011; 41:797–807
22. Gross SR, Sin CGT, Barraclough R, et al.: Joining S100 proteins and migration: for better or for worse, in sickness and in health. *Cell Mol Life Sci* 2014; 71:1551–1579
23. Sanchez-Arrones L, Cardozo M, Nieto-Lopez F, et al.: Cdon and Boc: Two transmembrane proteins implicated in cell–cell communication. *The International Journal of Biochemistry & Cell Biology* 2012; 44:698–702
