# Supplementary material for: Novel Outcome Biomarkers Identified With Targeted Proteomic Analyses of Plasma From Critically Ill Coronavirus Disease 2019 Patients
Source: PubMed Central journal article supplement — Crit Care Explor. 2020 Aug 24;2(9):e0189. doi: 10.1097/CCE.0000000000000189 (PMC7449255; doi:10.1097/cce.0000000000000189), 2020-08-24
Supplement: cc9-2-e0189-s003.pdf [file cc9-2-e0189-s003.pdf]

**Supplemental Table 3.** ICU Day 1 plasma proteins that predict COVID19 outcome.

| <b>Num</b> | <b>Assay</b> | <b>Unipro ID</b> | <b>Function</b>                                                                                                                                                                                                                                                                                    |
|------------|--------------|------------------|----------------------------------------------------------------------------------------------------------------------------------------------------------------------------------------------------------------------------------------------------------------------------------------------------|
| 1.         | CXCL9        | Q07325           | A chemokine produced by airway epithelial cells in response to infection (1), also induced by IFN $\gamma$ and in endothelial cells by TNF $\alpha$ (2). An agonist for CXCR3 on T cells and natural killer cells (2). Promotes NK, Th1, monocyte, DC, neutrophil, and eosinophil recruitment (1). |
| 2.         | ICOSLG       | O75144           | Inducible costimulator ligand is expressed by B cells, monocytes, DCs T cells and endothelial cells; TNF $\alpha$ is required for induction (3). It activates the inducible costimulator in the thymus and on activated T cells (3).                                                               |
| 3.         | CLM-1        | Q8TDQ1           | CMRF35-like molecule 1 is a receptor for phosphatidylserine presented on the outer membrane surface of apoptotic cells (4), that promotes macrophage and inhibits DC efferocytosis (5).                                                                                                            |
| 4.         | IL12RB1      | P42701           | One of the two subunits that compose the IL-12 receptor (6), its signaling pathway activates STAT4 (7). Expressed primarily on activated T cells and NK cells, less so on dendritic cells and some B-cells (6, 7). This subunit is also shared with the IL-23 receptor (8).                        |
| 5.         | CD83         | Q01151           | Expressed on B and T cells, monocytes, DCs, microglia and neutrophils, and has soluble and membrane-bound forms (9). Membrane-bound CD83 is essential for CD4 <sup>+</sup> T cell development and inhibiting autoimmunity, soluble CD83 induces regulatory mechanisms for tolerance (9).           |
| 6.         | CA12         | O43570           | Carbonic anhydrase 12 is membrane-associated glycoprotein that catalyzes the reversible hydration of carbon dioxide (10). CA12 is up-regulated by hypoxia, at least in tumor environments (11) and CA activity is associated with sleep apnea-related hypoxemia (12).                              |
| 7.         | FLRT2        | O43155           | Fibronectin leucine rich transmembrane protein 2 was first discovered in a screen for extracellular matrix proteins (13) and participates in homotypic cell-cell adhesion and with fibroblast growth factor receptor (14).                                                                         |
| 8.         | ROR1         | Q01973           | A transmembrane receptor tyrosine kinase that is activated by Wnt family ligands and is mainly thought to be involved in organ/tissue genesis during development (15). Though recent evidence suggests it may be involved in pro-inflammatory p65 activation, at least in cancer (16).             |
| 9.         | IL32         | P24001           | Expressed by PBMCs, epithelial cells and NKs, it up-regulates other pro-inflammatory cytokines and has several isoforms (17). Airway epithelial cell production of IL32 is increased by viral infections and oxidative stress (1).                                                                 |
| 10.        | NCS1         | P62166           | Neuronal calcium sensor 1 is a cytosolic protein involved in several cellular functions through binding partners and                                                                                                                                                                               |

|     |         |        |                                                                                                                                                                                                                                                                                                                                             |
|-----|---------|--------|---------------------------------------------------------------------------------------------------------------------------------------------------------------------------------------------------------------------------------------------------------------------------------------------------------------------------------------------|
|     |         |        | intracellular Ca <sup>2+</sup> regulation (18). It is highly expressed in neurons, but is not neuron-specific (18).                                                                                                                                                                                                                         |
| 11. | S100A11 | P31949 | A cytosolic calcium-binding protein of the S100 family, it is involved in growth arrest in contact inhibition (19). It is expressed in a wide variety of cells and is secreted by an unconventional pathway (19). It is involved in cell-cell contacts and can promote cell migration in response to hypoxia-induced mitogenic factor (20). |
| 12. | ANGPTL7 | O43827 | Angiopoietin-like protein 7 is an orphan ligand, but appears to be involved in hematopoietic stem cell regulation and self-renewal (21). Its serum concentration is higher in obese subjects compared to non-obese controls and can be lowered with exercise (22).                                                                          |
| 13. | CLMP    | Q9H6B4 | Coxsackievirus and adenovirus receptor-like membrane protein is a transmembrane glycoprotein involved in homophilic cell-cell adhesion and is expressed in a wide variety of tissues (23).                                                                                                                                                  |
| 14. | IGF1R   | P08069 | A tyrosine kinase receptor expressed on T and B cells, macrophages, NK cells and granulocytes where its ligands, insulin-like growth factor 1 and 2, causes various effects such as proliferation, cytokine production and priming/activation (2).                                                                                          |
| 15. | TOP2B   | Q02880 | DNA topoisomerase II beta is expressed in a wide variety of tissues and throughout the cell cycle (24). Mostly found in the cell's nucleus, it is one of the enzymes that catalyzes topological changes in DNA (24).                                                                                                                        |
| 16. | FAM3B   | P58499 | Also called pancreatic derived factor (PANDER), it is highly expressed in pancreatic islets and high serum levels are associated with the progression of metabolic syndrome and type 2 diabetes (25).                                                                                                                                       |
| 17. | IL10.1  | P22301 | An important anti-inflammatory cytokine, expressed in virtually all immune cells except plasmacytoid DCs, to limit immune responses and prevent host damage (26).                                                                                                                                                                           |
| 18. | IL10    | P22301 | See "IL10.1" above.                                                                                                                                                                                                                                                                                                                         |
| 19. | THY 1   | P04216 | Thymocyte differentiation antigen 1 is a glycoprotein expressed on the outer surface of many cell types including fibroblasts, T cells and activated endothelial cells and has a soluble form (27). Its function is cell and tissue-dependent, but is pro-fibrotic in pulmonary fibroblasts in pulmonary fibrosis (27).                     |
| 20. | PVRL4   | Q96NY8 | Poliovirus receptor-related protein 4 also called nectin-4 is a cell-cell adhesion molecule in adherens junctions, overexpressed in several cancers (28).                                                                                                                                                                                   |
| 21. | OPTC    | Q9UBM4 | Opticin is an extracellular matrix protein associated with collagen in the vitreous humor where it binds heparan and                                                                                                                                                                                                                        |

|  |  |  |                                                                                |
|--|--|--|--------------------------------------------------------------------------------|
|  |  |  | chondroitin sulfate (29, 30). It is an anti-angiogenic factor in retinas (30). |
|--|--|--|--------------------------------------------------------------------------------|

CXCR – CXC receptor

DC – dendritic cell

IFN $\gamma$  – interferon gamma

IL – interleukin

NK – natural killer cell

PBMC – peripheral blood monocyte cell

STAT – signal transducer and activator of transcription

Th# – type # T helper cell

TNF $\alpha$  – tumor necrosis factor alpha

## References

1. Foti M, Locati M: Cytokine Effector Functions in Tissues [Internet]. San Diego, UNITED STATES: Elsevier Science & Technology; 2017. [cited 2020 Jun 9] Available from: <http://ebookcentral.proquest.com/lib/west/detail.action?docID=4917635>
2. Thomson AW, Lotze MT: The cytokine handbook. Amsterdam; Boston: Academic Press; 2003.
3. Richter G, Burdach S: ICOS: A New Costimulatory Ligand/Receptor Pair and Its Role in T-Cell Activation. *ORT* 2004; 27:91–95
4. Choi S-C, Simhadri VR, Tian L, et al.: Cutting Edge: Mouse CD300f (CLM-1) recognizes outer-membrane exposed phosphatidylserine and can promote phagocytosis. *J Immunol* 2011; 187:3483–3487
5. Tian L, Choi S-C, Lee H-N, et al.: Enhanced efferocytosis by dendritic cells underlies memory T-cell expansion and susceptibility to autoimmune disease in CD300f-deficient mice. *Cell Death Differ* 2016; 23:1086–1096
6. Presky DH, Yang H, Minetti LJ, et al.: A functional interleukin 12 receptor complex is composed of two  $\beta$ -type cytokine receptor subunits. *PNAS* 1996; 93:14002–14007

7. Trinchieri G: Interleukin-12 and the regulation of innate resistance and adaptive immunity. *Nature Reviews Immunology* 2003; 3:133–146
8. Wojno EDT, Hunter CA, Stumhofer JS: The immunobiology of the Interleukin-12 family: Room for discovery. *Immunity* 2019; 50:851–870
9. Grosche L, Knippertz I, König C, et al.: The CD83 Molecule – An Important Immune Checkpoint [Internet]. *Front Immunol* 2020; 11[cited 2020 Jun 10] Available from: <https://www.ncbi.nlm.nih.gov/pmc/articles/PMC7181454/>
10. Waheed A, Sly WS, Doisy EA: Carbonic Anhydrase XII Functions in Health and Disease. *Gene* 2017; 623:33–40
11. Chiche J, Ilc K, Laferrière J, et al.: Hypoxia-Inducible Carbonic Anhydrase IX and XII Promote Tumor Cell Growth by Counteracting Acidosis through the Regulation of the Intracellular pH. *Cancer Res* 2009; 69:358–368
12. Wang T, Eskandari D, Zou D, et al.: Increased Carbonic Anhydrase Activity is Associated with Sleep Apnea Severity and Related Hypoxemia. *Sleep* 2015; 38:1067–1073
13. Lacy SE, Bönnemann CG, Buzney EA, et al.: Identification of FLRT1, FLRT2, and FLRT3: A Novel Family of Transmembrane Leucine-Rich Repeat Proteins. *Genomics* 1999; 62:417–426
14. Karaulanov EE, Böttcher RT, Niehrs C: A role for fibronectin-leucine-rich transmembrane cell-surface proteins in homotypic cell adhesion. *EMBO Rep* 2006; 7:283–290
15. Stricker S, Rauschenberger V, Schambony A: Chapter Four - ROR-Family Receptor Tyrosine Kinases [Internet]. In: Jenny A, editor(s). *Current Topics in Developmental Biology*. Academic Press; 2017. p. 105–142.[cited 2020 Jun 10] Available from: <http://www.sciencedirect.com/science/article/pii/S007021531630179X>
16. Lopez-Bergami P, Barbero G: The emerging role of Wnt5a in the promotion of a pro-inflammatory and immunosuppressive tumor microenvironment. *Cancer Metastasis Rev* 2020;
17. Catalan-Dibene J, McIntyre LL, Zlotnik A: Interleukin 30 to Interleukin 40. *Journal of Interferon & Cytokine Research* 2018; 38:423
18. Boeckel GR, Ehrlich BE: NCS-1 is a Regulator of Calcium Signaling in Health and Disease. *Biochim Biophys Acta Mol Cell Res* 2018; 1865:1660–1667
19. Sakaguchi M, Huh N: S100A11, a dual growth regulator of epidermal keratinocytes. *Amino Acids* 2011; 41:797–807
20. Gross SR, Sin CGT, Barraclough R, et al.: Joining S100 proteins and migration: for better or for worse, in sickness and in health. *Cell Mol Life Sci* 2014; 71:1551–1579

21. Kadomatsu T, Oike Y: Roles of angiopoietin-like proteins in regulation of stem cell activity. *J Biochem* 2019; 165:309–315
22. Abu-Farha M, Cherian P, Al-Khairi I, et al.: Plasma and adipose tissue level of angiopoietin-like 7 (ANGPTL7) are increased in obesity and reduced after physical exercise. *PLOS ONE* 2017; 12:e0173024
23. Matthäus C, Langhorst H, Schütz L, et al.: Cell-cell communication mediated by the CAR subgroup of immunoglobulin cell adhesion molecules in health and disease. *Molecular and Cellular Neuroscience* 2017; 81:32–40
24. Austin CA, Lee KC, Swan RL, et al.: TOP2B: The First Thirty Years [Internet]. *Int J Mol Sci* 2018; 19[cited 2020 Jun 11] Available from: <https://www.ncbi.nlm.nih.gov/pmc/articles/PMC6163646/>
25. Zhang X, Yang W, Wang J, et al.: FAM3 gene family: A promising therapeutical target for NAFLD and type 2 diabetes. *Metabolism* 2018; 81:71–82
26. Howes A, Stimpson P, Redford P, et al.: Interleukin-10: Cytokines in Anti-inflammation and Tolerance [Internet]. In: Yoshimoto T, Yoshimoto T, editor(s). *Cytokine Frontiers: Regulation of Immune Responses in Health and Disease*. Tokyo: Springer Japan; 2014. p. 327–352.[cited 2020 Jun 9] Available from: [https://doi.org/10.1007/978-4-431-54442-5\\_13](https://doi.org/10.1007/978-4-431-54442-5_13)
27. Bradley JA, Ramirez G, Hagood JS: Roles and Regulation of Thy-1, a Context-Dependent Modulator of Cell Phenotype. *Biofactors* 2009; 35:258–265
28. Takai Y, Miyoshi J, Ikeda W, et al.: Nectins and nectin-like molecules: roles in contact inhibition of cell movement and proliferation. *Nat Rev Mol Cell Biol* 2008; 9:603–615
29. Le Goff MM, Bishop PN: Focus on Molecules: Opticin. *Experimental Eye Research* 2007; 85:303–304
30. Bishop PN: The role of extracellular matrix in retinal vascular development and preretinal neovascularization. *Experimental Eye Research* 2015; 133:30–36
