# Supplementary material for: Novel Outcome Biomarkers Identified With Targeted Proteomic Analyses of Plasma From Critically Ill Coronavirus Disease 2019 Patients
Source: PubMed Central journal article supplement — Crit Care Explor. 2020 Aug 24;2(9):e0189. doi: 10.1097/CCE.0000000000000189 (PMC7449255; doi:10.1097/cce.0000000000000189), 2020-08-24
Supplement: cc9-2-e0189-s004.pdf [file cc9-2-e0189-s004.pdf]

**Supplemental Table 4.** ICU day 3 plasma proteins that predict COVID19 outcome.

| <b>Num</b> | <b>Assay</b> | <b>Uniprot ID</b> | <b>Function</b>                                                                                                                                                                                                                                                                                                         |
|------------|--------------|-------------------|-------------------------------------------------------------------------------------------------------------------------------------------------------------------------------------------------------------------------------------------------------------------------------------------------------------------------|
| 1.         | IL12RB1      | P42701            | One of the two subunits that form the IL-12 receptor (1). Expressed primarily on activated T cells and NK cells, less so on dendritic cells and some B-cells (1, 2). This subunit is also shared with the IL-23 receptor (3).                                                                                           |
| 2.         | CLM-1        | Q8TDQ1            | CMRF35-like molecule 1 also called CD300f, is a receptor for phosphatidylserine presented on the outer membrane of apoptotic cells (4), that promotes macrophage and inhibits DC efferocytosis (5).                                                                                                                     |
| 3.         | CXCL9        | Q07325            | A chemokine produced by airway epithelial cells in response to infection (6), also induced by IFN $\gamma$ and in endothelial cells by TNF (7). An agonist for CXCR3 on T cells and natural killer cells (7). Promotes NK, Th1, monocyte, DC, neutrophil, and eosinophil recruitment (6).                               |
| 4.         | FAM3B        | P58499            | Family with sequence similarity 3, also called pancreatic derived factor (PANDER), is a cytokine-like protein that is highly expressed in pancreatic islets and high serum levels are associated with the progression of metabolic syndrome and type 2 diabetes (8).                                                    |
| 5.         | OPTC         | Q9UBM4            | Opticin is an extracellular matrix protein associated with collagen in the vitreous humor where it binds heparan and chondroitin sulfate (9, 10). It is an anti-angiogenic factor in retinas (10).                                                                                                                      |
| 6.         | THY 1        | P04216            | Thymocyte differentiation antigen 1 is a glycoprotein expressed on the outer surface of many cell types including fibroblasts, T cells and activated endothelial cells and has a soluble form (11). Its function is cell and tissue-dependent, but is pro-fibrotic in pulmonary fibroblasts in pulmonary fibrosis (11). |
| 7.         | ICOSLG       | O75144            | Inducible costimulator ligand is a transmembrane protein expressed by B cells, monocytes, DCs T cells and endothelial cells; TNF $\alpha$ is required for induction (12). It activates the inducible costimulator in the thymus and on activated T cells (12).                                                          |
| 8.         | IGF1R        | P08069            | A tyrosine kinase receptor expressed on T and B cells, macrophages, NK cells and granulocytes where its ligands, insulin-like growth factor 1 and 2, causes various effects such as proliferation, cytokine production and priming/activation (7).                                                                      |
| 9.         | IL10.1       | P22301            | An important anti-inflammatory cytokine, expressed in virtually all immune cells except plasmacytoid DCs, it works to limit immune responses and prevent host damage (13).                                                                                                                                              |

|     |         |        |                                                                                                                                                                                                                                                                                                                                             |
|-----|---------|--------|---------------------------------------------------------------------------------------------------------------------------------------------------------------------------------------------------------------------------------------------------------------------------------------------------------------------------------------------|
| 10. | CLMP    | Q9H6B4 | Coxsackievirus and adenovirus receptor-like membrane protein is a transmembrane glycoprotein involved in homophilic cell-cell adhesion and is expressed in a wide variety of tissues (14).                                                                                                                                                  |
| 11. | IL10    | P22301 | See “IL10.1” above.                                                                                                                                                                                                                                                                                                                         |
| 12. | CD83    | Q01151 | Expressed on B and T cells, monocytes, DCs, microglia and neutrophils, and has soluble and membrane-bound forms (15). Membrane-bound CD83 is essential for CD4 <sup>+</sup> T cell development and inhibiting autoimmunity, soluble CD83 induces regulatory mechanisms for tolerance (15).                                                  |
| 13. | ROR1    | Q01973 | A transmembrane receptor tyrosine kinase that is activated by Wnt family ligands and is mainly thought to be involved in organ/tissue genesis during development (16). Though recent evidence suggests it may be involved in pro-inflammatory p65 activation, at least in cancer (17).                                                      |
| 14. | PVRL4   | Q96NY8 | Poliovirus receptor-related protein 4 also called nectin-4 is a cell-cell adhesion molecule in adherens junctions, overexpressed in several cancers (18).                                                                                                                                                                                   |
| 15. | IL32    | P24001 | Expressed by PBMCs, epithelial cells and NKs, it up-regulates other pro-inflammatory cytokines and has several isoforms (19). Airway epithelial cell production is increased by viral infections and oxidative stress (6).                                                                                                                  |
| 16. | CA12    | O43570 | Carbonic anhydrase 12 is membrane-associated glycoprotein that catalyzes the reversible hydration of carbon dioxide (20). CA12 is up-regulated by hypoxia, at least in tumor environments (21) and CA activity is associated with sleep apnea-related hypoxemia (22).                                                                       |
| 17. | NCS1    | P62166 | Neuronal calcium sensor 1 is a cytosolic protein involved in several cellular functions through binding partners and intracellular Ca <sup>2+</sup> regulation (23). It is highly expressed in neurons, but is not neuron-specific (23).                                                                                                    |
| 18. | FLRT2   | O43155 | Fibronectin leucine rich transmembrane protein 2 was first discovered in a screen for extracellular matrix proteins (24) and participates in homotypic cell-cell adhesion as well as fibroblast growth factor receptor signaling (25).                                                                                                      |
| 19. | S100A11 | P31949 | A cytosolic calcium-binding protein of the S100 family, it is involved in growth arrest in contact inhibition (26). It is expressed in a wide variety of cells and is secreted by an unconventional pathway (26). It is involved in cell-cell contacts and can promote cell migration in response to hypoxia-induced mitogenic factor (27). |
| 20. | TOP2B   | Q02880 | DNA topoisomerase II beta is expressed in a wide variety of tissues and throughout the cell cycle (28). Mostly found in the cell’s nucleus, it is one of the enzymes that catalyzes topological changes in DNA (28).                                                                                                                        |

|     |         |        |                                                                                                                                                                                                                                                                    |
|-----|---------|--------|--------------------------------------------------------------------------------------------------------------------------------------------------------------------------------------------------------------------------------------------------------------------|
| 21. | ANGPTL7 | O43827 | Angiopoietin-like protein 7 is an orphan ligand, but appears to be involved in hematopoietic stem cell regulation and self-renewal (29). Its serum concentration is higher in obese subjects compared to non-obese controls and can be lowered with exercise (30). |
|-----|---------|--------|--------------------------------------------------------------------------------------------------------------------------------------------------------------------------------------------------------------------------------------------------------------------|

CD – cluster of differentiation

CXCL – CXC ligand

CXCR – CXC receptor

DC – dendritic cell

IFN $\gamma$  – interferon gamma

IL – interleukin

NK – natural killer cell

PBMC – peripheral blood monocyte cell

STAT – signal transducer and activator of transcription

Th# – type # T helper cell

TNF $\alpha$  – tumor necrosis factor alpha

## References

1. Presky DH, Yang H, Minetti LJ, et al.: A functional interleukin 12 receptor complex is composed of two  $\beta$ -type cytokine receptor subunits. *PNAS* 1996; 93:14002–14007
2. Trinchieri G: Interleukin-12 and the regulation of innate resistance and adaptive immunity. *Nature Reviews Immunology* 2003; 3:133–146
3. Wojno EDT, Hunter CA, Stumhofer JS: The immunobiology of the Interleukin-12 family: Room for discovery. *Immunity* 2019; 50:851–870
4. Choi S-C, Simhadri VR, Tian L, et al.: Cutting Edge: Mouse CD300f (CLM-1) recognizes outer-membrane exposed phosphatidylserine and can promote phagocytosis. *J Immunol* 2011; 187:3483–3487
5. Tian L, Choi S-C, Lee H-N, et al.: Enhanced efferocytosis by dendritic cells underlies memory T-cell expansion and susceptibility to autoimmune disease in CD300f-deficient mice. *Cell Death Differ* 2016; 23:1086–1096

6. Foti M, Locati M: Cytokine Effector Functions in Tissues [Internet]. San Diego, UNITED STATES: Elsevier Science & Technology; 2017. [cited 2020 Jun 9] Available from: <http://ebookcentral.proquest.com/lib/west/detail.action?docID=4917635>
7. Thomson AW, Lotze MT: The cytokine handbook. Amsterdam; Boston: Academic Press; 2003.
8. Zhang X, Yang W, Wang J, et al.: FAM3 gene family: A promising therapeutical target for NAFLD and type 2 diabetes. *Metabolism* 2018; 81:71–82
9. Le Goff MM, Bishop PN: Focus on Molecules: Opticin. *Experimental Eye Research* 2007; 85:303–304
10. Bishop PN: The role of extracellular matrix in retinal vascular development and preretinal neovascularization. *Experimental Eye Research* 2015; 133:30–36
11. Bradley JA, Ramirez G, Hagood JS: Roles and Regulation of Thy-1, a Context-Dependent Modulator of Cell Phenotype. *Biofactors* 2009; 35:258–265
12. Richter G, Burdach S: ICOS: A New Costimulatory Ligand/Receptor Pair and Its Role in T-Cell Activation. *ORT* 2004; 27:91–95
13. Howes A, Stimpson P, Redford P, et al.: Interleukin-10: Cytokines in Anti-inflammation and Tolerance [Internet]. In: Yoshimoto T, Yoshimoto T, editor(s). *Cytokine Frontiers: Regulation of Immune Responses in Health and Disease*. Tokyo: Springer Japan; 2014. p. 327–352.[cited 2020 Jun 9] Available from: [https://doi.org/10.1007/978-4-431-54442-5\\_13](https://doi.org/10.1007/978-4-431-54442-5_13)
14. Matthäus C, Langhorst H, Schütz L, et al.: Cell-cell communication mediated by the CAR subgroup of immunoglobulin cell adhesion molecules in health and disease. *Molecular and Cellular Neuroscience* 2017; 81:32–40
15. Grosche L, Knippertz I, König C, et al.: The CD83 Molecule – An Important Immune Checkpoint [Internet]. *Front Immunol* 2020; 11[cited 2020 Jun 10] Available from: <https://www.ncbi.nlm.nih.gov/pmc/articles/PMC7181454/>
16. Stricker S, Rauschenberger V, Schambony A: Chapter Four - ROR-Family Receptor Tyrosine Kinases [Internet]. In: Jenny A, editor(s). *Current Topics in Developmental Biology*. Academic Press; 2017. p. 105–142.[cited 2020 Jun 10] Available from: <http://www.sciencedirect.com/science/article/pii/S007021531630179X>
17. Lopez-Bergami P, Barbero G: The emerging role of Wnt5a in the promotion of a pro-inflammatory and immunosuppressive tumor microenvironment. *Cancer Metastasis Rev* 2020;
18. Takai Y, Miyoshi J, Ikeda W, et al.: Nectins and nectin-like molecules: roles in contact inhibition of cell movement and proliferation. *Nat Rev Mol Cell Biol* 2008; 9:603–615

19. Catalan-Dibene J, McIntyre LL, Zlotnik A: Interleukin 30 to Interleukin 40. *Journal of Interferon & Cytokine Research* 2018; 38:423
20. Waheed A, Sly WS, Doisy EA: Carbonic Anhydrase XII Functions in Health and Disease. *Gene* 2017; 623:33–40
21. Chiche J, Ilc K, Laferrière J, et al.: Hypoxia-Inducible Carbonic Anhydrase IX and XII Promote Tumor Cell Growth by Counteracting Acidosis through the Regulation of the Intracellular pH. *Cancer Res* 2009; 69:358–368
22. Wang T, Eskandari D, Zou D, et al.: Increased Carbonic Anhydrase Activity is Associated with Sleep Apnea Severity and Related Hypoxemia. *Sleep* 2015; 38:1067–1073
23. Boeckel GR, Ehrlich BE: NCS-1 is a Regulator of Calcium Signaling in Health and Disease. *Biochim Biophys Acta Mol Cell Res* 2018; 1865:1660–1667
24. Lacy SE, Bönnemann CG, Buzney EA, et al.: Identification of FLRT1, FLRT2, and FLRT3: A Novel Family of Transmembrane Leucine-Rich Repeat Proteins. *Genomics* 1999; 62:417–426
25. Karaulanov EE, Böttcher RT, Niehrs C: A role for fibronectin-leucine-rich transmembrane cell-surface proteins in homotypic cell adhesion. *EMBO Rep* 2006; 7:283–290
26. Sakaguchi M, Huh N: S100A11, a dual growth regulator of epidermal keratinocytes. *Amino Acids* 2011; 41:797–807
27. Gross SR, Sin CGT, Barraclough R, et al.: Joining S100 proteins and migration: for better or for worse, in sickness and in health. *Cell Mol Life Sci* 2014; 71:1551–1579
28. Austin CA, Lee KC, Swan RL, et al.: TOP2B: The First Thirty Years [Internet]. *Int J Mol Sci* 2018; 19[cited 2020 Jun 11] Available from: <https://www.ncbi.nlm.nih.gov/pmc/articles/PMC6163646/>
29. Kadomatsu T, Oike Y: Roles of angiopoietin-like proteins in regulation of stem cell activity. *J Biochem* 2019; 165:309–315
30. Abu-Farha M, Cherian P, Al-Khairi I, et al.: Plasma and adipose tissue level of angiopoietin-like 7 (ANGPTL7) are increased in obesity and reduced after physical exercise. *PLOS ONE* 2017; 12:e0173024
